# Supplementary material for: The Gut Microbiome in Schizophrenia and the Potential Benefits of Prebiotic and Probiotic Treatment
Source: PubMed Central journal article supplement (PMC8065775; doi:10.3390/nu13041152), 2021-03-31

Supplementary Figure S1: Flowchart of study search and selection

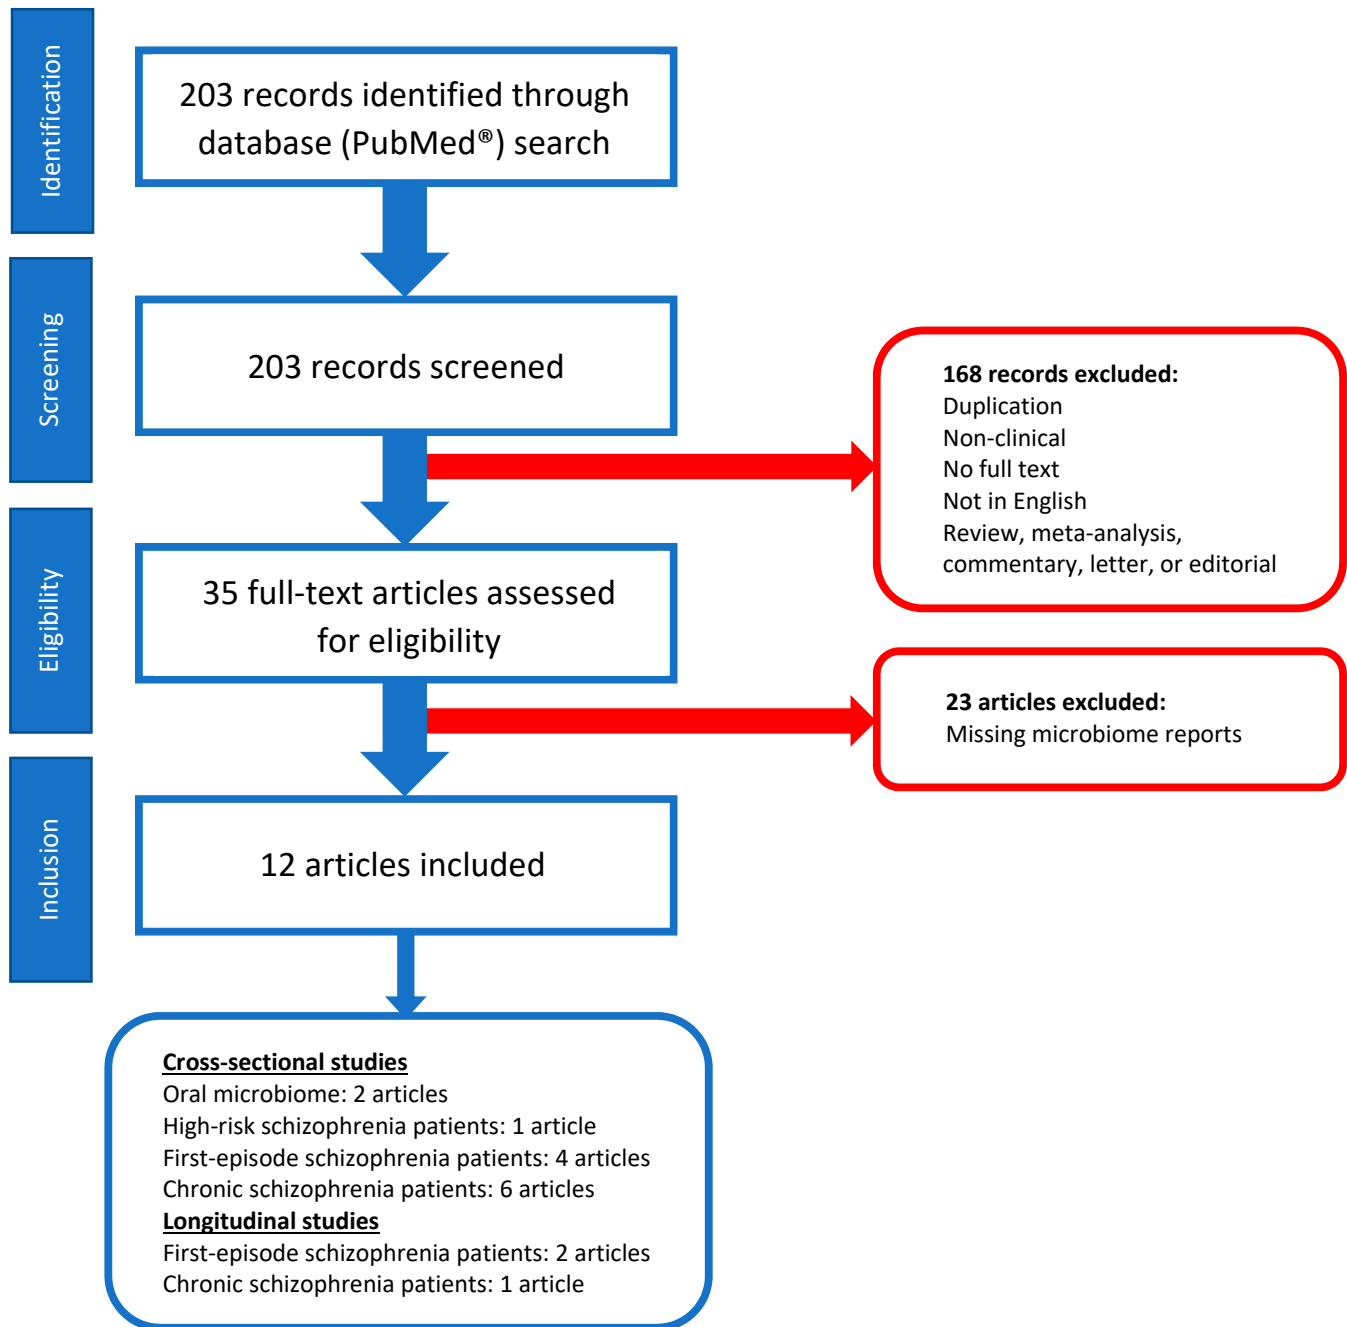

Supplement: nutrients-13-01152-s001.pdf [file nutrients-13-01152-s001.pdf]
